# Supplementary material for: Two TGA Transcription Factor Members from Hyper-Susceptible Soybean Exhibiting Significant Basal Resistance to Soybean mosaic virus
Source: MDPI journal article supplement (doi:10.3390/ijms222111329), 2021-10-20
Supplement: s1 [file s1]

activating sequence 1, solid line arrows represent direct activation regulation, dashed line arrows represent indirect activation regulation and blocked arrows indicate repression.

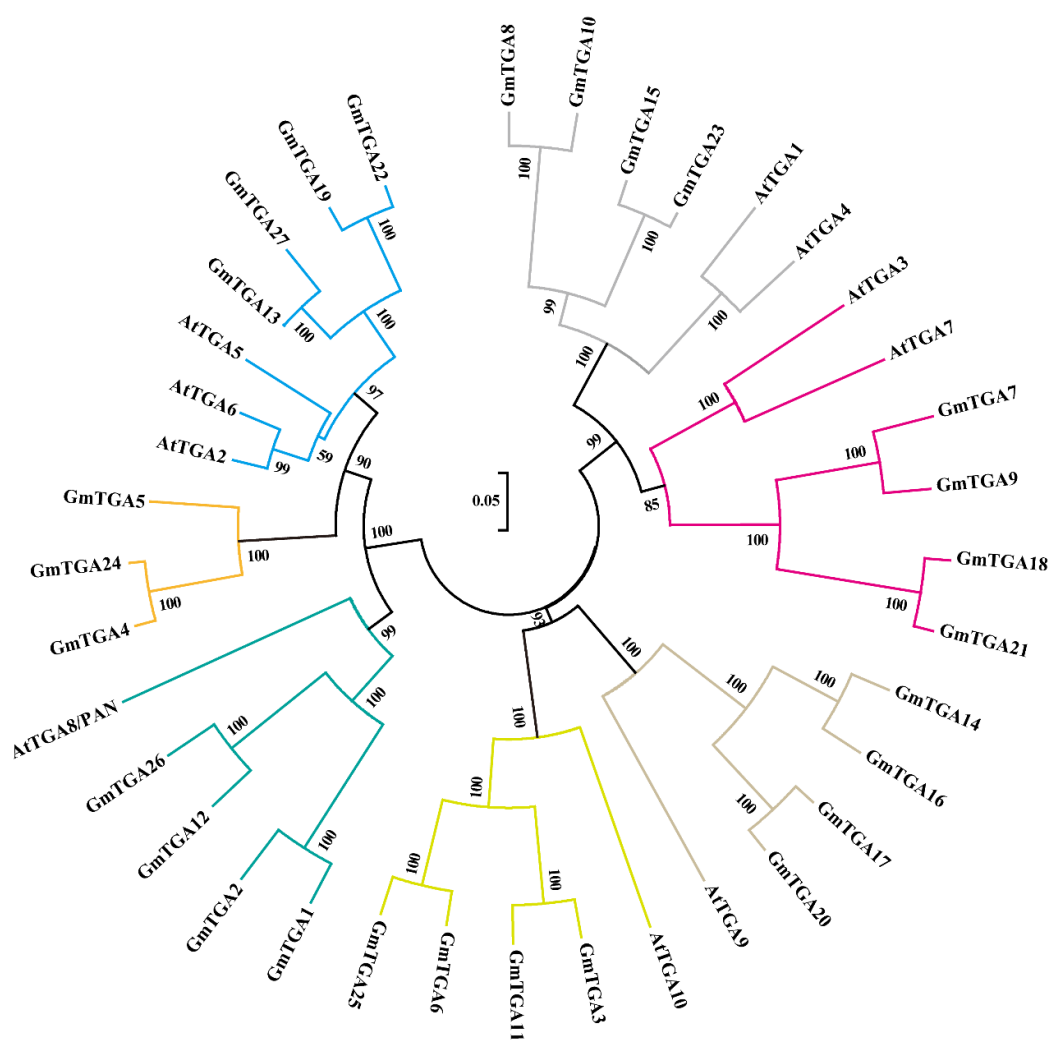

**Figure S2.** Phylogenetic analyses of TGA proteins from *Arabidopsis* and soybean. Each group is marked by a separate color.

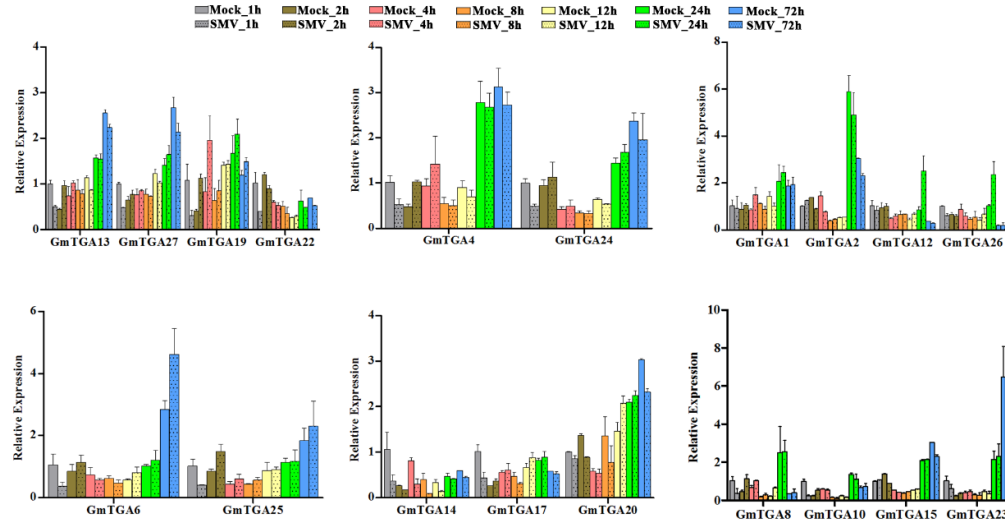

**Figure S3.** Expression profiles of *GmTGA* genes of soybean *NN138-2* before and after SMV inoculation at 1, 2, 4, 8, 12, 24 and 72 h post-inoculation (hpi). RNAs isolated from non-inoculated and inoculated unifoliate leaves of soybean were employed to analyze the expression of 7 groups of *GmTGA* genes using qRT-PCR. The relative expression levels were calculated using the  $2^{-\Delta\Delta C_t}$  method. Mock-inoculated soybean leaves at 1 h as the control (relative expression = 1). Data are presented as mean  $\pm$  standard deviation from three independent experiments.

**Table S1.** The primers are used to amplify TGA TFs from soybean cultivar *NN138-2*.

| Name           | Primer sequence (5'to 3')                       | Size(bp) | Template |
|----------------|-------------------------------------------------|----------|----------|
| <i>GmTGA1</i>  | CAGTGTGTGACTGTGTCTGA/GAGCCAACATTGGAAGTCCT       | 1643     | cDNA     |
| <i>GmTGA2</i>  | CTGCTGCTGCTTTTGTAACG/TGCAATGCTACCTGATTGTTG      | 1827     | cDNA     |
| <i>GmTGA3</i>  | AGAAGGCGGTTTCACCATT/ATGGGAAAGTCCAGAGGGAG        | 1752     | cDNA     |
| <i>GmTGA4</i>  | GGGTTTGCAGGGCCATTATT/AACACACACCACGAAACAAGT      | 2053     | cDNA     |
| <i>GmTGA5</i>  | ATGGGTAGTGCAGAACTTTA/TCACTCCCTTGGCCTG           | 873      | cDNA     |
| <i>GmTGA6</i>  | GTTTCGCCATTGATGAGAGC/TGATATGAGGGGGAGAGAG        | 1691     | cDNA     |
| <i>GmTGA7</i>  | CCTATAGAAACTCTTTTATT/ACACGGCATTAACCTATTCA       | 1238     | cDNA     |
| <i>GmTGA8</i>  | GTAGCAGCGGAGGATTTCTG/AGCCGGAACAGGATGATAAG       | 1271     | cDNA     |
| <i>GmTGA9</i>  | ATTTGGGCGTTGCAAGAGAT/TTCCACTACATGTCTCTCCTT      | 1520     | cDNA     |
| <i>GmTGA10</i> | ATGTGTATGCACCGAATCGC/GCAATAGACATATCCTTTCAGG     | 1445     | cDNA     |
| <i>GmTGA11</i> | TCTATATCTCTTTGCGTGGAC/TCGTTATTATCATCACCACCAC    | 1653     | DNA      |
| <i>GmTGA12</i> | GCAACACCACACTACAGTCC/GGCACAATATCCGCTTGACA       | 1680     | cDNA     |
| <i>GmTGA13</i> | TCAAATCTGGTCAGTGGTGATA/TCATCTAAATTCCTTCAACTGTGT | 1276     | cDNA     |
| <i>GmTGA14</i> | TATGTATTACTTTGACAGGA/ACATAAGAGACACGAGAGGA       | 1763     | cDNA     |
| <i>GmTGA15</i> | TAGGAGTATGTGTTGAATGA/ATATACACCATGCGTCCAAA       | 1378     | cDNA     |
| <i>GmTGA16</i> | TGAGAATGGTCTAAGAAGCC/CTGACACTCTTCCATTCT         | 1618     | cDNA     |
| <i>GmTGA17</i> | TCCCTAAAACACACATAGAGCTT/GAGCTTCCTCATCATGCACA    | 1736     | cDNA     |
| <i>GmTGA18</i> | GTTTGTATTGGCCAGATAGGGT/TTGTGCAAACCACATTACAGT    | 1249     | cDNA     |
| <i>GmTGA19</i> | GAATTGTTGATGTGGTGGTGAG/GGAAAACATGGCAACTGAAACA   | 1735     | cDNA     |
| <i>GmTGA20</i> | TAGAGGTAAGCTTCAGGGAA/CTTCTTTCAGGCTAATGGGT       | 1261     | cDNA     |
| <i>GmTGA21</i> | TCTGAGGTTGAGGTTTCATTC/GTAGATTTGAGCACCTGTTGTG    | 1343     | DNA      |
| <i>GmTGA22</i> | GACAAGGGAGCTGAAAGAGG/ACTGACTAGCATTTTGAACCCA     | 1936     | cDNA     |
| <i>GmTGA23</i> | TCCTGCCACCTTCTATTCT/TGCGCTCTTGTAACCTTGTT        | 1303     | cDNA     |
| <i>GmTGA24</i> | ATTTGGGTTGCTCCCCTTT/AGTCTTTAAGGGGGTCAGGT        | 1554     | cDNA     |
| <i>GmTGA25</i> | AGAAGACACAGAAGGCGCTA/TGCAGAAAAAGAACGGAAGG       | 1807     | cDNA     |
| <i>GmTGA26</i> | ACACCTCATCCTCACTACCAT/ACGCATAACATTGGCACAAC      | 1587     | cDNA     |
| <i>GmTGA27</i> | AAAAGGGAACAGCAAGAGGG/CCCTTCAACTGTGTTACAATGG     | 1578     | cDNA     |

**Table S2.** The qRT-PCR primers for the 27 *GmTGA* genes of soybean cultivar *NN138-2*.

| Name                          | Primer sequence (5'to 3')                       | Size(bp) |
|-------------------------------|-------------------------------------------------|----------|
| <i>GmTGA1</i>                 | GGCTTGGAAGCATTGCAACA/AGTGCCATTGGCCCATGTA        | 104      |
| <i>GmTGA2</i>                 | GGCATGGAAGCATTGCAACA/GAGGTCGGCCTTGTGAAGAA       | 156      |
| <i>GmTGA3</i>                 | ACACAAGAGGCAGAAGAGGC/GACCACAGAGAACTCAGGGC       | 299      |
| <i>GmTGA4</i>                 | CTAATGGTTCGCCCAGCTCA/CCTGGCAAGCCACAAAGAAC       | 245      |
| <i>GmTGA5</i>                 | GGGACGGGTTCAGCATACATT/TTGACTGTGCCTGATCTCCAG     | 173      |
| <i>GmTGA6</i>                 | GGATTGGTGGATTACAGGCCA/CCTCGAGTCCTTGGGAGAGA      | 144      |
| <i>GmTGA7</i>                 | AAAGTTGATGGCGGTCTGAA/CCAGCTCCAATTGCATGAGC       | 265      |
| <i>GmTGA8</i>                 | CGGACTCTGTAGGACCAGGA/TCCCCAAAGCAAGCAGAAA        | 190      |
| <i>GmTGA9</i>                 | TCAGCAAGTTAGCCTGTGGG/TCCAGCTCCAGTTGCATGAG       | 300      |
| <i>GmTGA10</i>                | TGGATTGGAGGATTTGCCCC/GTCTACAGAGTCAGCGAGC        | 178      |
| <i>GmTGA11</i>                | ACACAAGAGGCAGAAGAGGC/CAGAAATGGCCACCAAGCAC       | 259      |
| <i>GmTGA12</i>                | ATGGCTCGGTGGTTTTTCGAT/GAGGGCCCTAAAGAGGAGGA      | 198      |
| <i>GmTGA13</i>                | GTCCCTTGTTGCTGTGGCTT/TCTTGACGCCTCGCGATT         | 100      |
| <i>GmTGA14</i>                | CTGAAAGGGGTGGCTGCTAA/ACGAATGCCCGAGTTCACAT       | 187      |
| <i>GmTGA15</i>                | AAAGTTTGGTTGTACTTTGCCAAC/ACACACTCATACTTCTCGGGG  | 284      |
| <i>GmTGA16</i>                | TGGACTCCGGCATTCGTTAG/ACAAGAAAACACCGTGCTGC       | 249      |
| <i>GmTGA17</i>                | GTTGCAGCAGTCACTTGTGG/GTGCTGCTTGACGAACTGTG       | 179      |
| <i>GmTGA18</i>                | TCCGGCTTTCATCTCAGCAA/GCAGCTTGAGCAGTTGTCAG       | 235      |
| <i>GmTGA19</i>                | TGCTGTCTGGCATGTGGAAA/ATGCTTCCATGCCCTGAGAC       | 192      |
| <i>GmTGA20</i>                | GTCAGGAGGGGAAAGCACTG/GCTGATCTTGGGGCATCACT       | 183      |
| <i>GmTGA21</i>                | TACGCCGTGCACTAGATGTC/GCCTTTGCAGCTTCTGCTTT       | 235      |
| <i>GmTGA22</i>                | GAAGCCCTTGCTGCTGTTTC/ATTCTGCTCTCCAGCCACC        | 300      |
| <i>GmTGA23</i>                | GGCAGTTTGCTGCACTGAT/TTAGAGGCATGGCTGCACTT        | 160      |
| <i>GmTGA24</i>                | GCTGCTATTGCTGGGTCTCA/CACCCCTTTCAGGCCTTTGA       | 175      |
| <i>GmTGA25</i>                | GGTTTCGTGAGACAGGCTGA/GTGCCAGCCACAAAGAACTG       | 148      |
| <i>GmTGA26</i>                | CTCTAGGGCCCTCTGGTTCT/GCTTGGCACGTGGTCAAAAT       | 160      |
| <i>GmTGA27</i>                | ATTTGCGCCAGCAGACTTTG/AGGGCACGCAACCTAGAAAA       | 106      |
| <i>GmEF1B</i> <sup>†</sup>    | CCACTGCTGAAGAAGATGATGATG/AAGGACAGAAGACTTGCCACTC | 134      |
| <i>GmACTIN11</i> <sup>†</sup> | ATTTTGACTGAGCGTGGTTATTCC/GCTGGTCCTGGCTGTCTCC    | 126      |

<sup>†</sup>Represent the primer sequences are originated from the literature which is reported by Ma et al. (2013) (<https://doi.org/10.1371/journal.pone.0075271>).

**Table S3.** The construction primers of transient overexpression constructs

| Constructs Name      | Primer sequence (5'to 3')                                                                                                             |
|----------------------|---------------------------------------------------------------------------------------------------------------------------------------|
| p103- <i>GFP</i>     | Forward primer: ttggagaggacacgctcgagATGGTGAGCAAGGGCGAGG<br>Reverse primer: gactcacctaggtcacacgtgTCACTTGTACAGCTCGTCCATGC               |
| p103- <i>GmTGA1</i>  | Forward primer: ttggagaggacacgctcgagATGCCATTCTCTTCTCAAAGACACA<br>Reverse primer: gactcacctaggtcacacgtgTCACTCTCTAGGGCGCGCC             |
| p103- <i>GmTGA2</i>  | Forward primer: ttggagaggacacgctcgagATGAAAAATATGAAGGCTTCAAG<br>Reverse primer: gactcacctaggtcacacgtgCTACTCTCTAGGGCGCGCC               |
| p103- <i>GmTGA4</i>  | Forward primer: ttggagaggacacgctcgagATGGGTAGCAGAAGTAGAACAGTAAACG<br>Reverse primer: gactcacctaggtcacacgtgTCACTCCCTTGGCCTGGC           |
| p103- <i>GmTGA6</i>  | Forward primer: ttggagaggacacgctcgagATGATGGCTTCTTCAAAGACCAC<br>Reverse primer: gactcacctaggtcacacgtgCTATTCTTGGCGAGGGCGT               |
| p103- <i>GmTGA8</i>  | Forward primer: ttggagaggacacgctcgagATGGATGCTACATCCTCACCGT<br>Reverse primer: gactcacctaggtcacacgtgCTAAGCATGTCCTGGAAATTGAGG           |
| p103- <i>GmTGA10</i> | Forward primer: ttggagaggacacgctcgagATGGATGCTACATCCTCACAGTTTG<br>Reverse primer: gactcacctaggtcacacgtgCTAATGTTTGATGACTGACTTAGTAAGTTCT |
| p103- <i>GmTGA12</i> | Forward primer: ttggagaggacacgctcgagATGCAAAGCTTCAACACAACCG<br>Reverse primer: gactcacctaggtcacacgtgCTAGTACTCTCTAGGACACGCTAACCA        |
| p103- <i>GmTGA13</i> | Forward primer: ttggagaggacacgctcgagATGGCTGACGCCAGTCCTAG<br>Reverse primer: gactcacctaggtcacacgtgTCAGTCTCTTGGGCGGGC                   |
| p103- <i>GmTGA14</i> | Forward primer: ttggagaggacacgctcgagATGGCGAGCCAAAGAATAGGA<br>Reverse primer: gactcacctaggtcacacgtgTCAGAACTTGAGAAATGATTCTGAGA          |
| p103- <i>GmTGA15</i> | Forward primer: ttggagaggacacgctcgagATGAATTCAGCATCCCCGC<br>Reverse primer: gactcacctaggtcacacgtgCTAAGCAGGTTCCCGGGG                    |
| p103- <i>GmTGA17</i> | Forward primer: ttggagaggacacgctcgagATGGCGAGCCACAGAATAGG<br>Reverse primer: gactcacctaggtcacacgtgTCAGAACTTGAGAAATAATTCTGAGAA          |
| p103- <i>GmTGA19</i> | Forward primer: ttggagaggacacgctcgagATGGGGAGTAGAACTACCTGGAGG<br>Reverse primer: gactcacctaggtcacacgtgTCAATCTCTAGGGCGAGCAAGC           |
| p103- <i>GmTGA20</i> | Forward primer: ttggagaggacacgctcgagATGGCGAGCCACAGAATAGG<br>Reverse primer: gactcacctaggtcacacgtgTCAGAACTTGAGAAATAATTCTGAGAA          |
| p103- <i>GmTGA22</i> | Forward primer: ttggagaggacacgctcgagATGCCGAGCTCCAATTCTGA<br>Reverse primer: gactcacctaggtcacacgtgTCAATCTCTAGGGCGAGCAAGC               |
| p103- <i>GmTGA23</i> | Forward primer: ttggagaggacacgctcgagATGAATTCAGCATCCCCGC<br>Reverse primer: gactcacctaggtcacacgtgCTAAGCAGGTTACGAGGTCTATTAG             |
| p103- <i>GmTGA24</i> | Forward primer: ttggagaggacacgctcgagATGGGTAGCAGAAGTAGAACGGTAA<br>Reverse primer: gactcacctaggtcacacgtgTCACTCCCTTGGCCTAGCAA            |
| p103- <i>GmTGA25</i> | Forward primer: ttggagaggacacgctcgagATGGCTTCTTCAAAGACCACCA<br>Reverse primer: gactcacctaggtcacacgtgCTATTCTTGGCGAGGGCGT                |
| p103- <i>GmTGA26</i> | Forward primer: ttggagaggacacgctcgagATGCAAAGCTTCAACACAACAACC<br>Reverse primer: gactcacctaggtcacacgtgCTAGTACTCTCTGGGACACGCTAACCC      |
| p103- <i>GmTGA27</i> | Forward primer: ttggagaggacacgctcgagATGCCGAGCTTTGATTACAAA<br>Reverse primer: gactcacctaggtcacacgtgTCAGTCTCTTGGGCGGGC                  |
| p103- <i>CP</i>      | Forward primer: ttggagaggacacgctcgagATGTCAGGCAAGGAGAAAGAAGG<br>Reverse primer: gactcacctaggtcacacgtgTCACTGCTGTGGACCTATGCC             |
